# Supplementary material for: A diverse host thrombospondin-type-1 repeat protein repertoire promotes symbiont colonization during establishment of cnidarian-dinoflagellate symbiosis
Source: eLife journal article supplement (doi:10.7554/elife.24494), 2017-05-05
Supplement: supp [file elife-24494-supp-v1.zip]

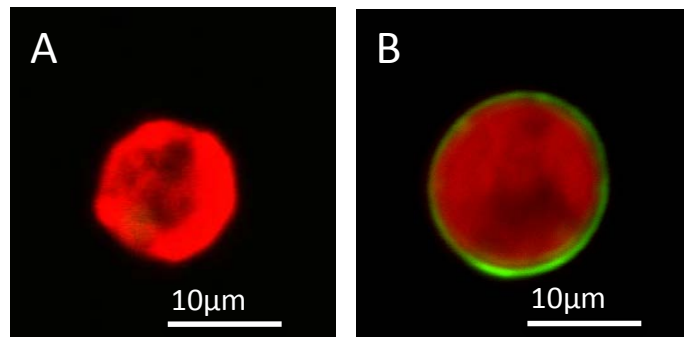

Figure 4 – figure supplement 2. Lipophilic membrane staining of dinoflagellate cells using Dil. Lipophilic membrane stain Dil was absent from (A) cultured algae but present in (B) freshly isolated symbionts. This is evidence of the presence of a symbiosome membrane surrounding freshly isolated symbionts.
