# Supplementary material for: A diverse host thrombospondin-type-1 repeat protein repertoire promotes symbiont colonization during establishment of cnidarian-dinoflagellate symbiosis
Source: eLife journal article supplement (doi:10.7554/elife.24494), 2017-05-05
Supplement: supp [file elife-24494-supp-v1.zip]

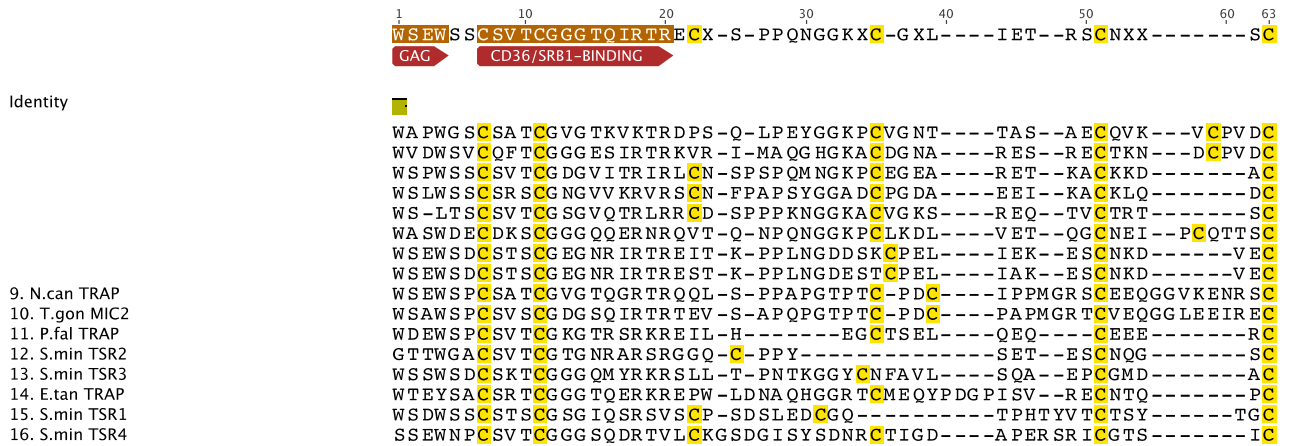

Figure 3 – figure supplement 1: TSR domain alignment compares apicomplexan TRAP TSR domains with TSR domains from the dinoflagellates *Symbiodinium minutum* and *S. microadriaticum*, TSR 2 from human TSP1, and ADAMTS-like TSR domains from the anemones *Nematostella vectensis* and *Aiptasia pallida*. Positioning and absence of specific cysteine residues (colored yellow) in TRAP and *Symbiodinium* TSRs will result in different patterns of disulfide bonds and three-dimensional folding. Binding sites for glycosaminoglycans (GAGs) and the scavenger receptors CD36/SRB1 (annotated in red) are somewhat conserved.
