# Supplementary material for: A diverse host thrombospondin-type-1 repeat protein repertoire promotes symbiont colonization during establishment of cnidarian-dinoflagellate symbiosis
Source: eLife journal article supplement (doi:10.7554/elife.24494), 2017-05-05
Supplement: supp [file elife-24494-supp-v1.zip › elife_poa_e24494_Figure_5_Source_Data_File_1.csv]

label	infection	hours	Treatment	Anemone
FSW A1 T1	13.7	120	FSW	1
FSW A1 T2	14.7	120	FSW	1
FSW A1 T3	29.6	120	FSW	1
FSW A2 T1	28.2	120	FSW	2
FSW A2 T2	12.4	120	FSW	2
FSW A2 T3	23.2	120	FSW	2
FSW A3 T1	24.8	120	FSW	3
FSW A3 T2	7.6	120	FSW	3
FSW A3 T3	8.6	120	FSW	3
FSW A1 T1	9.6	96	FSW	1
FSW A1 T2	13.5	96	FSW	1
FSW A1 T3	11.8	96	FSW	1
FSW A2 T1	12.7	96	FSW	2
FSW A2 T2	16.1	96	FSW	2
FSW A2 T3	15.3	96	FSW	2
FSW A3 T1	9	96	FSW	3
FSW A3 T2	12.3	96	FSW	3
FSW A3 T3	16.9	96	FSW	3
FSW A1 T1	1.8	48	FSW	1
FSW A1 T2	0.9	48	FSW	1
FSW A1 T3	0.6	48	FSW	1
FSW A2 T1	6	48	FSW	2
FSW A2 T2	1.4	48	FSW	2
FSW A2 T3	1.4	48	FSW	2
FSW A3 T1	2.4	48	FSW	3
FSW A3 T2	3	48	FSW	3
FSW A3 T3	4.2	48	FSW	3
anti TSP 0.5 A1 T1	0.2	120	anti-TSR	1
anti TSP 0.5 A1 T2	2.1	120	anti-TSR	1
anti TSP 0.5 A1 T3	1.8	120	anti-TSR	1
anti TSP 0.5 A2 T1	2	120	anti-TSR	2
anti TSP 0.5 A2 T2	2.4	120	anti-TSR	2
anti TSP 0.5 A2 T3	1.5	120	anti-TSR	2
anti TSP 0.5 A3 T1	0.5	120	anti-TSR	3
anti TSP 0.5 A3 T2	0.8	120	anti-TSR	3
anti TSP 0.5 A3 T3	0.6	120	anti-TSR	3
anti TSP 0.5 A1 T1	0.9	96	anti-TSR	1
anti TSP 0.5 A1 T2	0.8	96	anti-TSR	1
anti TSP 0.5 A1 T3	2.6	96	anti-TSR	1
anti TSP 0.5 A2 T1	2.6	96	anti-TSR	2
anti TSP 0.5 A2 T2	0.8	96	anti-TSR	2
anti TSP 0.5 A2 T3	0.6	96	anti-TSR	2
anti TSP 0.5 A3 T1	1.2	96	anti-TSR	3
anti TSP 0.5 A3 T2	1.1	96	anti-TSR	3
anti TSP 0.5 A3 T3	0.7	96	anti-TSR	3
anti TSP 0.5 A1 T1	0.6	72	anti-TSR	1
anti TSP 0.5 A1 T2	0.8	72	anti-TSR	1
anti TSP 0.5 A1 T3	0	72	anti-TSR	1
anti TSP 0.5 A2 T1	0.8	72	anti-TSR	2
anti TSP 0.5 A2 T2	0.2	72	anti-TSR	2
anti TSP 0.5 A2 T3	0.3	72	anti-TSR	2
anti TSP 0.5 A3 T1	1	72	anti-TSR	3
anti TSP 0.5 A3 T2	0.2	72	anti-TSR	3
anti TSP 0.5 A3 T3	0.5	72	anti-TSR	3
FSW A1 T1	4	72	FSW	1
FSW A1 T2	3.7	72	FSW	1
FSW A1 T3	5.1	72	FSW	1
FSW A2 T1	9.8	72	FSW	2
FSW A2 T2	7	72	FSW	2
FSW A2 T3	5.3	72	FSW	2
FSW A3 T1	3.5	72	FSW	3
FSW A3 T2	3.1	72	FSW	3
FSW A3 T3	4.9	72	FSW	3
anti TSP 0.5 A1 T1	0.8	48	anti-TSR	1
anti TSP 0.5 A1 T2	0.1	48	anti-TSR	1
anti TSP 0.5 A1 T3	0.2	48	anti-TSR	1
anti TSP 0.5 A2 T1	1.4	48	anti-TSR	2
anti TSP 0.5 A2 T2	1.3	48	anti-TSR	2
anti TSP 0.5 A2 T3	0.5	48	anti-TSR	2
anti TSP 0.5 A3 T1	0.6	48	anti-TSR	3
anti TSP 0.5 A3 T2	0.3	48	anti-TSR	3
anti TSP 0.5 A3 T3	0.2	48	anti-TSR	3
IgG 0.5 A1 T1	3.7	120	Igg	1
IgG 0.5 A1 T2	12.6	120	Igg	1
IgG 0.5 A1 T3	13.9	120	Igg	1
IgG 0.5 A2 T1	10.7	120	Igg	2
IgG 0.5 A2 T2	21.9	120	Igg	2
IgG 0.5 A2 T3	15.3	120	Igg	2
IgG 0.5 A1 T1	27.9	120	Igg	3
IgG 0.5 A1 T1	28	120	Igg	3
IgG 0.5 A1 T1	26	120	Igg	3
IgG 0.5 A1 T1	11.1	96	Igg	1
IgG 0.5 A1 T2	16.3	96	Igg	1
IgG 0.5 A1 T3	9.2	96	Igg	1
IgG 0.5 A2 T1	17.4	96	Igg	2
IgG 0.5 A2 T2	12.1	96	Igg	2
IgG 0.5 A2 T3	10.9	96	Igg	2
IgG 0.5 A1 T1	9.1	96	Igg	3
IgG 0.5 A1 T1	10.3	96	Igg	3
IgG 0.5 A1 T1	11.9	96	Igg	3
IgG 0.5 A1 T1	7.3	72	Igg	1
IgG 0.5 A1 T2	2.1	72	Igg	1
IgG 0.5 A1 T3	3.4	72	Igg	1
IgG 0.5 A2 T1	4.9	72	Igg	2
IgG 0.5 A2 T2	4.1	72	Igg	2
IgG 0.5 A2 T3	5.7	72	Igg	2
IgG 0.5 A1 T1	2.8	72	Igg	3
IgG 0.5 A1 T1	3.6	72	Igg	3
IgG 0.5 A1 T1	5.9	72	Igg	3
IgG 0.5 A1 T1	3.9	48	Igg	1
IgG 0.5 A1 T2	2.6	48	Igg	1
IgG 0.5 A1 T3	1.8	48	Igg	1
IgG 0.5 A2 T1	1.9	48	Igg	2
IgG 0.5 A2 T2	2.8	48	Igg	2
IgG 0.5 A2 T3	3.1	48	Igg	2
IgG 0.5 A1 T1	2.2	48	Igg	3
IgG 0.5 A1 T1	4.9	48	Igg	3
IgG 0.5 A1 T1	3.1	48	Igg	3
