# Supplementary material for: A diverse host thrombospondin-type-1 repeat protein repertoire promotes symbiont colonization during establishment of cnidarian-dinoflagellate symbiosis
Source: eLife journal article supplement (doi:10.7554/elife.24494), 2017-05-05
Supplement: supp [file elife-24494-supp-v1.zip › elife_poa_e24494_Figure_5_Source_Data_File_3.csv]

label	infection	hours	Treatment	Anemone
00 A1 001 120h	15.6	120	FSW	1
00 A1 002 120h	29.5	120	FSW	1
00 A1 003 120h	25.3	120	FSW	1
00 A1 004 120h	38	120	FSW	1
00 A2 001 120h	15.2	120	FSW	2
00 A2 002 120h	25.2	120	FSW	2
00 A2 003 120h	15.9	120	FSW	2
00 A3 001 120h	30.4	120	FSW	3
00 A3 002 120h	35.2	120	FSW	3
00 A3 003 120h	31.9	120	FSW	3
TSP A1 001 120h	24.6	120	Hs-TSR	1
TSP A1 002 120h	30.5	120	Hs-TSR	1
TSP A1 003 120h	36.6	120	Hs-TSR	1
TSP A2 001 120h	34.6	120	Hs-TSR	2
TSP A2 002 120h	28.7	120	Hs-TSR	2
TSP A2 003 120h	26.8	120	Hs-TSR	2
TSP A2 004 120h	41.6	120	Hs-TSR	2
TSP A3 001 120h	25.8	120	Hs-TSR	3
TSP A3 002 120h	34.3	120	Hs-TSR	3
TSP A3 003 120h	30	120	Hs-TSR	3
00 A1 001 96h	2.4	96	FSW	1
00 A1 002 96h	8.2	96	FSW	1
00 A1 003 96h	3.9	96	FSW	1
00 A2 001 96h	14.6	96	FSW	2
00 A2 002 96h	16	96	FSW	2
00 A2 003 96h	28	96	FSW	2
00 A3 001 96h	3.1	96	FSW	3
00 A3 002 96h	10	96	FSW	3
00 A3 003 96h	2.4	96	FSW	3
00 A3 004 96h	10.1	96	FSW	3
TSP A1 001 96h	30.8	96	Hs-TSR	1
TSP A1 002 96h	23.9	96	Hs-TSR	1
TSP A1 003 96h	15.9	96	Hs-TSR	1
TSP A2 001 96h	27.7	96	Hs-TSR	2
TSP A2 002 96h	26.9	96	Hs-TSR	2
TSP A2 003 96h	17.2	96	Hs-TSR	2
TSP A3 001 96h	40.9	96	Hs-TSR	3
TSP A3 002 96h	27.7	96	Hs-TSR	3
TSP A3 003 96h	15	96	Hs-TSR	3
00 A1 001 72h	7	72	FSW	1
00 A1 002 72h	2.2	72	FSW	1
00 A1 003 72h	9.4	72	FSW	1
00 A1 004 72h	7.2	72	FSW	1
00 A2 001 72h	14.8	72	FSW	2
00 A2 002 72h	7.3	72	FSW	2
00 A2 003 72h	13.6	72	FSW	2
00 A3 001 72h	11.7	72	FSW	3
00 A3 002 72h	7	72	FSW	3
00 A3 003 72h	8.3	72	FSW	3
TSP A1 001 72h	12.5	72	Hs-TSR	1
TSP A1 002 72h	17	72	Hs-TSR	1
TSP A1 003 72h	18.2	72	Hs-TSR	1
TSP A2 001 72h	17.9	72	Hs-TSR	2
TSP A2 002 72h	18.8	72	Hs-TSR	2
TSP A2 003 72h	10.9	72	Hs-TSR	2
TSP A2 004 72h	10.6	72	Hs-TSR	2
TSP A3 001 72h	16.2	72	Hs-TSR	3
TSP A3 002 72h	12.5	72	Hs-TSR	3
TSP A3 003 72h	8.3	72	Hs-TSR	3
00 A1 001 48h	1.8	48	FSW	1
00 A1 002 48h	0.6	48	FSW	1
00 A1 003 48h	0.4	48	FSW	1
00 A2 001 48h	0.3	48	FSW	2
00 A2 002 48h	1.1	48	FSW	2
00 A2 003 48h	1.9	48	FSW	2
00 A3 001 48h	1.3	48	FSW	3
00 A3 002 48h	0.3	48	FSW	3
00 A3 003 48h	2.9	48	FSW	3
TSP A1 001 48h	15.4	48	Hs-TSR	1
TSP A1 002 48h	10.7	48	Hs-TSR	1
TSP A1 003 48h	5.5	48	Hs-TSR	1
TSP A2 001 48h	9.3	48	Hs-TSR	2
TSP A2 002 48h	8	48	Hs-TSR	2
TSP A2 003 48h	4.4	48	Hs-TSR	2
TSP A2 004 48h	5.7	48	Hs-TSR	2
TSP A3 001 48h	7.2	48	Hs-TSR	3
TSP A3 002 48h	5.2	48	Hs-TSR	3
TSP A3 003 48h	9.1	48	Hs-TSR	3
