# Supplementary material for: A diverse host thrombospondin-type-1 repeat protein repertoire promotes symbiont colonization during establishment of cnidarian-dinoflagellate symbiosis
Source: eLife journal article supplement (doi:10.7554/elife.24494), 2017-05-05
Supplement: supp [file elife-24494-supp-v1.zip › elife_poa_e24494_Figure_5_Source_Data_File_5.csv]

label	infection	hours	Treatment	Anemone
00 A1 001 120h	22.2	120	FSW	1
00 A1 002 120h	15.6	120	FSW	1
00 A1 003 120h	18.3	120	FSW	1
00 A2 001 120h	22.2	120	FSW	2
00 A2 002 120h	12.6	120	FSW	2
00 A2 003 120h	9.2	120	FSW	2
00 A3 001 120h	14.5	120	FSW	3
00 A3 002 120h	17.9	120	FSW	3
00 A3 003 120h	20.6	120	FSW	3
PEP1 A1 001 120h	24.1	120	Peptide 1	1
PEP1 A1 002 120h	27.1	120	Peptide 1	1
PEP1 A1 003 120h	25.4	120	Peptide 1	1
PEP1 A2 001 120h	13	120	Peptide 1	2
PEP1 A2 002 120h	33.2	120	Peptide 1	2
PEP1 A2 003 120h	13.7	120	Peptide 1	2
PEP1 A3 001 120h	35.7	120	Peptide 1	3
PEP1 A3 002 120h	27.1	120	Peptide 1	3
PEP1 A3 003 120h	13.8	120	Peptide 1	3
PEP2 A1 001 120h	23.3	120	Peptide 2	1
PEP2 A1 002 120h	32	120	Peptide 2	1
PEP2 A1 003 120h	20.3	120	Peptide 2	1
PEP2 A2 001 120h	27.1	120	Peptide 2	2
PEP2 A2 002 120h	25.6	120	Peptide 2	2
PEP2 A2 003 120h	19.7	120	Peptide 2	2
PEP2 A3 001 120h	26	120	Peptide 2	3
PEP2 A3 002 120h	28	120	Peptide 2	3
PEP2 A3 003 120h	29.4	120	Peptide 2	3
00 A1 001 96h	3.7	96	FSW	1
00 A1 002 96h	5	96	FSW	1
00 A1 003 96h	10.4	96	FSW	1
00 A2 001 96h	6.9	96	FSW	2
00 A2 002 96h	9.6	96	FSW	2
00 A2 003 96h	6.1	96	FSW	2
00 A3 001 96h	8.9	96	FSW	3
00 A3 002 96h	4.8	96	FSW	3
00 A3 003 96h	5	96	FSW	3
PEP1 A1 001 96h	21.3	96	Peptide 1	1
PEP1 A1 002 96h	22.9	96	Peptide 1	1
PEP1 A1 003 96h	8.9	96	Peptide 1	1
PEP1 A2 001 96h	18.7	96	Peptide 1	2
PEP1 A2 002 96h	20.8	96	Peptide 1	2
PEP1 A2 003 96h	22	96	Peptide 1	2
PEP1 A3 001 96h	18.5	96	Peptide 1	3
PEP1 A3 002 96h	19	96	Peptide 1	3
PEP1 A3 003 96h	17	96	Peptide 1	3
PEP2 A1 001 96h	18.8	96	Peptide 2	1
PEP2 A1 002 96h	9.6	96	Peptide 2	1
PEP2 A1 003 96h	26.7	96	Peptide 2	1
PEP2 A2 001 96h	20	96	Peptide 2	2
PEP2 A2 002 96h	24.3	96	Peptide 2	2
PEP2 A2 003 96h	22	96	Peptide 2	2
PEP2 A3 001 96h	25	96	Peptide 2	3
PEP2 A3 002 96h	24.7	96	Peptide 2	3
PEP2 A3 003 96h	16.7	96	Peptide 2	3
00 A1 001 72h	14.7	72	FSW	1
00 A1 002 72h	6.7	72	FSW	1
00 A1 003 72h	3.4	72	FSW	1
00 A2 001 72h	5.7	72	FSW	2
00 A2 002 72h	5.2	72	FSW	2
00 A2 003 72h	2.2	72	FSW	2
00 A3 001 72h	11.3	72	FSW	3
00 A3 002 72h	3.6	72	FSW	3
00 A3 003 72h	3	72	FSW	3
PEP1 A1 001 72h	13.4	72	Peptide 1	1
PEP1 A1 002 72h	25.4	72	Peptide 1	1
PEP1 A1 003 72h	8.5	72	Peptide 1	1
PEP1 A2 001 72h	13.7	72	Peptide 1	2
PEP1 A2 002 72h	22.7	72	Peptide 1	2
PEP1 A2 003 72h	21	72	Peptide 1	2
PEP1 A3 001 72h	12.5	72	Peptide 1	3
PEP1 A3 002 72h	8.9	72	Peptide 1	3
PEP1 A3 003 72h	9.9	72	Peptide 1	3
PEP2 A1 001 72h	14.9	72	Peptide 2	1
PEP2 A1 002 72h	18.8	72	Peptide 2	1
PEP2 A1 003 72h	21.6	72	Peptide 2	1
PEP2 A2 001 72h	24.3	72	Peptide 2	2
PEP2 A2 002 72h	17.4	72	Peptide 2	2
PEP2 A2 003 72h	12.9	72	Peptide 2	2
PEP2 A3 001 72h	26.9	72	Peptide 2	3
PEP2 A3 002 72h	23	72	Peptide 2	3
PEP2 A3 003 72h	22.4	72	Peptide 2	3
00 A1 001 48h	3	48	FSW	1
00 A1 002 48h	3.6	48	FSW	1
00 A1 003 48h	0.9	48	FSW	1
00 A2 001 48h	2.1	48	FSW	2
00 A2 002 48h	1.3	48	FSW	2
00 A2 003 48h	0.8	48	FSW	2
00 A3 001 48h	2.3	48	FSW	3
00 A3 002 48h	2.5	48	FSW	3
00 A3 003 48h	2.2	48	FSW	3
PEP1 A1 001 48h	7.8	48	Peptide 1	1
PEP1 A1 002 48h	12.2	48	Peptide 1	1
PEP1 A1 003 48h	11.2	48	Peptide 1	1
PEP1 A2 001 48h	6.3	48	Peptide 1	2
PEP1 A2 002 48h	11.9	48	Peptide 1	2
PEP1 A2 003 48h	18.2	48	Peptide 1	2
PEP1 A3 001 48h	8.2	48	Peptide 1	3
PEP1 A3 002 48h	11	48	Peptide 1	3
PEP1 A3 003 48h	13.5	48	Peptide 1	3
PEP2 A1 001 48h	8.7	48	Peptide 2	1
PEP2 A1 002 48h	12.4	48	Peptide 2	1
PEP2 A1 003 48h	13.4	48	Peptide 2	1
PEP2 A2 001 48h	7.9	48	Peptide 2	2
PEP2 A2 002 48h	9.2	48	Peptide 2	2
PEP2 A2 003 48h	9.9	48	Peptide 2	2
PEP2 A3 001 48h	15	48	Peptide 2	3
PEP2 A3 002 48h	17.5	48	Peptide 2	3
PEP2 A3 003 48h	12	48	Peptide 2	3
