# Supplementary material for: A diverse host thrombospondin-type-1 repeat protein repertoire promotes symbiont colonization during establishment of cnidarian-dinoflagellate symbiosis
Source: eLife journal article supplement (doi:10.7554/elife.24494), 2017-05-05
Supplement: supp [file elife-24494-supp-v1.zip › elife_poa_e24494_Figure_6_Source_Data_File_1.csv]

Sample	Time	Symbiont	oral_disc	Sema	Trypsin
12hrinoc.1	12	1	3.96	2.471169041	-0.30035719
12hrinoc.2	12	1	5	2.055736883	0.867849798
12hrinoc.3	12	1	3.51	2.008769599	-1.165443704
12hrapo.1	12	0	5.05	-0.454752235	-0.752321722
12hrapo.2	12	0	2.16	0.630379053	-0.190609178
12hrapo.3	12	0	4.62	-0.175626818	0.942930899
24hrinoc.1	24	1	2.93	0.612779237	0.124186347
24hrinoc.2	24	1	3.92	0.342166221	-0.081944934
24hrinoc.3	24	1	6.03	-0.910933093	-2.604742072
24hrapo.1	24	0	3.24	0.914909302	1.076080791
24hrapo.2	24	0	NA	-0.194835203	-1.400983457
24hrapo.3	24	0	4.68	-0.720074098	0.324902666
72hrinoc.1	72	1	3.92	-1.056184323	-1.281735504
72hrinoc.2	72	1	3.74	-3.432814291	-2.465421899
72hrinoc.3	72	1	2.46	-1.612711553	-1.542422789
72hrapo.1	72	0	2.42	-0.347190903	-0.216214756
72hrapo.2	72	0	3.33	0.534742908	0.207054479
72hrapo.3	72	0	3.95	-0.187552005	0.009160277
