# Supplementary material for: A diverse host thrombospondin-type-1 repeat protein repertoire promotes symbiont colonization during establishment of cnidarian-dinoflagellate symbiosis
Source: eLife journal article supplement (doi:10.7554/elife.24494), 2017-05-05
Supplement: supp [file elife-24494-supp-v1.zip › elife_poa_e24494_Supplementary_File_1.xlsx]

## Sheet: ADAMTS-like
Sequence	Organism	Original identifier/ Accession Number	Domain structure (Pfam)	Length of protein
N.vecAD1	Nematostella vectensis	95408	TSR-ADAM spacer1-TSRx12-GON	1592aa
N.vecAD2	Nematostella vectensis	202989	TSR-ADAM spacer1-TSRx25-GON	2664aa
N.vecAD3	Nematostella vectensis	208839	TSRx31- VWA-GON	4575aa
N.vecAD4	Nematostella vectensis	212944	TSR-ADAM spacer1-TSRx3	756aa
N.vecAD5	Nematostella vectensis	87270	Pep M12B propep-Reprolysin-TSRx3	957aa
N.vecAD6	Nematostella vectensis	246133	Pep M12B propep-Reprolysin-TSR-ADAMspacer1-TSRx3	981aa
N.vecAD7	Nematostella vectensis	201879	Pep M12B propep-Reprolysin-TSR-ADAMspacer1-TSR	1007aa
N.vecAD8	Nematostella vectensis	247539	Pep M12B propep-Reprolysin-TSR-ADAMspacer1-TSRx5	1146aa
N.vecAD9	Nematostella vectensis	193804	Pep M12B propep-Reprolysin-TSR-ADAMspacer1-TSRx5	1147aa
N.vecAD10	Nematostella vectensis	101427	Reprolysin-TSR-ADAMspacer1	503aa
N.vecAD11	Nematostella vectensis	30346	Pep M12B propep-Reprolysin-TSR-ADAMspacer1-TSRx4	1049aa
N.vecAD12	Nematostella vectensis	246133	Pep M12B propep-Reprolysin-TSR-ADAMspacer1-TSRx3	1023aa
N.vecAD13	Nematostella vectensis	246132	Pep M12B propep-Reprolysin-TSR-ADAMspacer1-TSRx3	1137aa
N.vecAD14	Nematostella vectensis	30019	Pep M12B propep-Reprolysin-TSR-ADAMspacer1-TSRx7	1312aa
N.vecAD15	Nematostella vectensis	217812	Pep M12B propep-Reprolysin-TSR-ADAMspacer1-TSRx4	1125aa
N.vecAD16	Nematostella vectensis	215900	Pep M12B propep-Reprolysin-TSR-ADAMspacer1	801aa
N.vecAD17	Nematostella vectensis	215897	Pep M12B propep-Reprolysin-TSR	950aa
N.vecAD18	Nematostella vectensis	133001	Pep M12B propep-Reprolysin-TSR-ADAMspacer1-TSRx4	1053aa
N.vecAD19	Nematostella vectensis	246793	Pep M12B propep-Reprolysin-TSR-ADAMspacer1-TSRx3-fn3	1665aa
N.vecAD20	Nematostella vectensis	212948	Reprolysin-TSRx3	773aa
N.vecAD21	Nematostella vectensis	30434	Reprolysin-TSR-ADAMspacer1-TSRx3	834aa
N.vecAD22	Nematostella vectensis	174601	Reprolysin-TSR-ADAMspacer1-TSRx5	1021aa
N.vecAD23	Nematostella vectensis	95477	Reprolysin-TSR-ADAMspacer1	659aa
N.vecAD24	Nematostella vectensis	222694	Reprolysin-TSR	484aa
N.vecAD25	Nematostella vectensis	212950	Reprolysin-ADAMspacer1-TSRx5	1030aa
N.vecAD26	Nematostella vectensis	126434	Reprolysin	260aa
N.vecAD27	Nematostella vectensis	139926	ADAMspacer1-TSRx3-PLAC	477aa
N.vecAD28	Nematostella vectensis	99266	ADAMspacer1-TSRx3-PLAC	531aa
A.eleAD	Anthopleura elegantissima	comp13383	Pep M12B propep-Reprolysin-Disintegrin-F5F8TypeC x2-ADAMspacer1-TSR	1304aa
AipAD1	Aiptasia pallida	AIPGENE11735 / KXJ11171.1	Pep_M12B_propep-Reprolysin-Preprolysin-Disin-ACR-TSR-FBG	1069aa
AipAD2	Aiptasia pallida	AIPGENE18891	Reprolysin-Disintegrin-F5_F8_TypeC-ADAM-CR-TSR	920aa
AipAD3	Aiptasia pallida	AIPGENE14327	Pep_M12B_propep-Reprolysin-TSR-ADAM_spacer1	881aa
AipAD4	Aiptasia pallida	AIPGENE26625	Reprolysin-TSR-ADAM-TS_Spacer1-TSRx2-bZIP_2	1193aa
AipAD5	Aiptasia pallida	AIPGENE17896	Pep_M12B_propep-Reprolysin-TSR-ADAM_spacer1-TSRx17-GON	2730aa
AipAD6	Aiptasia pallida	AIPGENE14348	Pep_M12B_propep-Reprolysin-TSR-ADAM_spacer1-TSR	927aa
AipAD7	Aiptasia pallida	AIPGENE3355	Pep_M12B_propep-Reprolysin-TSRx2-	2077aa
AipAD8	Aiptasia pallida	AIPGENE3413	Pep_M12B_propep-Reprolysin-TSR-ADAM_spacer1	683aa
AipAD9	Aiptasia pallida	AIPGENE320	Pep_M12B_propep-Reprolysin-TSR-ADAM_spacer1-TSRx3	1285aa
AipAD10	Aiptasia pallida	AIPGENE28991	F5/8_TypeC-ADAMCR-TSRx2	1120aa
AipAD11	Aiptasia pallida	AIPGENE15743	Pep_M12B_propep-Reprolysin-Reprolysin-Disintigrin-F5_F8_TypeC-ADAMCR-TSR	1178aa
AipAD12	Aiptasia pallida	AIPGENE22504	Pep_M12B_propep-Reprolysin-TSRx4	1088aa
AipAD13	Aiptasia pallida	AIPGENE3437	Pep_M12B_propep-Reprolysin-ADAM spacer 1-TSR	1006aa
AipAD14	Aiptasia pallida	AIPGENE669	Pep_M12B_propep-Reprolysin-TSR	958aa
AipAD15	Aiptasia pallida	AIPGENE19813	Pep_M12B_propep-Reprolysin-TSR	419aa
AipAD16	Aiptasia pallida	AIPGENE3361	ADAM_Spacer-TSR-WSC	511aa
AipAD17	Aiptasia pallida	AIPGENE19810	ADAM_Spacer-TSR-WSC	675aa
AipAD18	Aiptasia pallida	AIPGENE7831	ADAM_Spacer-TSR-I_setx2	898aa
A.digAD1	Acropora digitifera	aug_v2a.24510.t1	Pep M12B propep-Reprolysin-TSR-ADAMspacer1-TSRx26-GON	2386aa
A.digAD2	Acropora digitifera	aug_v2a.22282.t1	Pep M12B propep-Reprolysin-TSR-	810aa
A.digAD3	Acropora digitifera	aug_v2a.01169.t1	Pep M12B propep-Reprolysin-TSR-ADAMspacer1-TSRx4	1030aa
A.digAD4	Acropora digitifera	aug_v2a.05200.t1	Pep M12B propep-Reprolysin-TSR-ADAMspacer1-TSRx3	924aa
A.digAD5	Acropora digitifera	aug_v2a.05790.t1	Pep M12B propep-Reprolysin-TSR-ADAMspacer1-TSRx2	935aa
A.digAD6	Acropora digitifera	aug_v2a.10799.t1	ADAMspacer1-TSRx5	632aa
A.digAD7	Acropora digitifera	aug_v2a.14055.t1	Pep M12B propep-Reprolysin-Disintegrin-ADAMspacer1-TSR	899aa
A.digAD8	Acropora digitifera	aug_v2a.14580.t1	TSR-ADAMspacer1-TSR	391aa
A.digAD9	Acropora digitifera	aug_v2a.13631.t1	TSR-ADAMspacer1	485aa
A.digAD10	Acropora digitifera	aug_v2a.13245.t1	ADAMspacer1-TSRx3	523aa
A.digAD11	Acropora digitifera	aug_v2a.01169.t1	Pep M12B propep-Reprolysin-TSR-ADAMspacer1-TSRx4-PLAC	874aa
A.milAD1	Acropora millepora	C000480	ADAM spacer1-TSRx28-GON	2246aa
A.milAD2	Acropora millepora	C017471	Pep M12B propep-Reprolysin	421aa
A.milAD3	Acropora millepora	C023777	Pep M12B propep-Reprolysin	381aa
A.milAD4	Acropora millepora	C009153	Pep M12B propep-Reprolysin-TSR-ADAMspacer1	777aa
A.milAD5	Acropora millepora	C001892	Pep M12B propep-Reprolysin-TSR-ADAMspacer1-TSR	956aa
A.milAD6	Acropora millepora	C002682	Pep M12B propep-Reprolysin-TSR-ADAMspacer1	931aa
A.milAD7	Acropora millepora	C002928	Pep M12B propep-Reprolysin-TSR-ADAMspacer1	1139aa
A.milAD8	Acropora millepora	C003233	Pep M12B propep-Reprolysin-TSR-ADAMspacer1-TSRx3	1011aa
A.milAD9	Acropora millepora	C002240	Pep M12B propep-Reprolysin-TSR-ADAMspacer1-TSRx2	1041aa
A.milAD10	Acropora millepora	C002566	Pep M12B propep-Reprolysin-TSR-ADAMspacer1-TSRx3-WSC	1210aa
A.milAD11	Acropora millepora	C001019	Pep M12B propep-Reprolysin-TSR-ADAMspacer1-TSRx2-CUBx2	1557aa
A.milAD12	Acropora millepora	C008221	Reprolysin-TSR-ADAMspacer1-TSRx2	777aa
A.milAD13	Acropora millepora	C004467	Reprolysin-TSR-ADAMspacer1-TSRx3	939aa
A.milAD14	Acropora millepora	C018737	Pep M12B propep-Reprolysin	436aa
A.milAD15	Acropora millepora	C000549	Pep M12B propep-VHL-Reprolysin-TSR-MAM-ADAMspacer1-TSRx3-MAM-PLAC	1575aa
A.milAD16	Acropora millepora	C004934	Pep M12B propep-Reprolysin-TSR-ADAMspacer1-TSRx3	987aa
A.milAD17	Acropora millepora	C002834	Reprolysin-TSR-ADAMspacer1-TSRx3-EGF	1236aa
A.milAD18	Acropora millepora	C010562	TSR-ADAMspacer1-TSRx2	670aa
S.pisAD1	Stylophora pistillatta	Spis19692	SIG-Pep M12B propep-Reprolysin-TSR-ADAMSP-TSR	1032aa
S.pisAD2	Stylophora pistillatta	Spis17420	Pep M12B propep-Reprolysin-TSR-ADAMSP-TSRx2	1075aa
S.pisAD3	Stylophora pistillatta	Spis1488	Pep M12B propep-Reprolysin-TSR-ADAMSP-TSRx3	1354aa
S.pisAD4	Stylophora pistillatta	Spis10967	Pep M12B propep-Reprolysin-TSR-ADAMSP-TSRx3	1141aa
S.pisAD5	Stylophora pistillatta	Spis18290	SIG-Pep M12B propep-Reprolysin-TSR-ADAMSP-TSRx5	1183aa
S.pisAD6	Stylophora pistillatta	Spis1486	SIG-Pep M12B propep-Reprolysin-TSR-ADAMSP-TSRx2	1096aa
S.pisAD7	Stylophora pistillatta	Spis13809	SIG-Pep M12B propep-Reprolysin-TSRx3 CUBX2	1537 aa
S.pisAD8	Stylophora pistillatta	Spis2407	ADAMSP-TSRx6-ISET-IG3	1124aa
S.pisAD9	Stylophora pistillatta	Spis12681	ADAMSP-TSRx33-GON	2561aa
S.pisAD10	Stylophora pistillatta	Spis2986	TSR-ADAMSP-TSRX2	652aa
S.pisAD11	Stylophora pistillatta	Spis347	SIG-TSR-ADAMSP-TSRX5-PLAC	762aa
S.pisAD12	Stylophora pistillatta	Spis19693	Pep M12B propep-Reprolysin-TSR-ADAMSP-TSR	961aa
S.pisAD13	Stylophora pistillatta	Spis1490	Pep M12B propep-TSR-EGFX2-WSC	1117aa

## Sheet: SEMAphorins
Sequence	Organism	Original identifier/ Accession Number	Domain structure (Pfam)	Length of protein
N.vecSEMA	Nematostella vectensis	197331	SEMA-PSI-TSRx2	991aa
A.eleSEMA	Anthopleura elegantissima	comp571	SEMA-TSRx2	989aa
AIPSEMA	Aiptasia pallida	AIPGENE5847 / KXJ28304.1	SEMA-TSRx2	993aa
A.digSEMA	Acropora digitifera	aug_v2a.14561.t1	SEMA-TSRx2	814aa
A.milSEMA	Acropora millepora	c001041p	SEMA-TSR	943aa
S.pisSEMA	Stylophora pistillatta	Spis10820	SEMA-TSRx2	861aa

## Sheet: TSR domain only
Sequence	Organism	Original identifier/ Accession Number	Domain structure (Pfam)	Length of protein
n/a	Nematostella vectensis	33857, 138675, 2608, 86049, 34322	TSRx6	n/a
n/a	Nematostella vectensis	110159, 116985	TSRx5	n/a
n/a	Nematostella vectensis	919	TSRx4	243aa
n/a	Nematostella vectensis	101342, 241642	TSRx3	n/a
n/a	Nematostella vectensis	112027, 39497, 84016, 27059, 101677, 110056, 110059, 112221, 112324, 117067, 120076, 121678, 122783, 126293, 128245, 129869, 130270, 138181, 155648, 185165, 201458, 28108, 39429, 39467, 57118, 81752, 8468, 85411, 85746, 86478, 88028, 88031, 9083, 91405, 92306, 92318, 9250, 9631	TSRx2	n/a
n/a	Nematostella vectensis	218033, 39112, 121670, 127215, 146328, 148689, 5633, 19215, 126298, 147698, 148395, 79287, 94713, 97881, 6402, 16630, 6589, 106372, 110258, 110590, 116940, 119602, 79262, 86063, 9468, 9859, 119266, 245175, 203983, 214340, 218031	TSRx1	n/a
A.eleTSR1	Anthopleura elegantissima	comp2495	TSRx3	314aa
A.eleTSR2	Anthopleura elegantissima	comp44203	TSRx4	405aa
A.eleTSR3	Anthopleura elegantissima	comp52752	TSRx3	272aa
A.eleTSR4	Anthopleura elegantissima	comp6899	TSRx3	151aa
A.eleTSR5	Anthopleura elegantissima	comp137837	TSRx6	394aa
A.eleTSR6	Anthopleura elegantissima	comp123466	TSRx7	547aa
A.eleTSR7	Anthopleura elegantissima	comp109002	TSRx10	581aa
AipTSR1	Aiptasia pallida	AIPGENE16069 / KXJ23074.1	TSRx1	202aa
AipTSR2	Aiptasia pallida	AIPGENE16041 / KXJ23053.1	TSRx1	124aa
AipTSR3	Aiptasia pallida	AIPGENE8807 / KXJ12843	TSRx1	177aa
AipTSR4	Aiptasia pallida	AIPGENE3700 / KXJ14935.1	TSRx1	129aa
AipTSR5	Aiptasia pallida	AIPGENE17583 / KXJ27250.1	TSRx1	190aa
AipTSR6	Aiptasia pallida	AIPGENE10319 / KXJ15604.1	TSRx1	94aa
AipTSR7	Aiptasia pallida	AIPGENE20288 / KXJ14081.1	TSRx1	336aa
AipTSR8	Aiptasia pallida	AIPGENE28287 / KXJ16261.1	TSRx1	208aa
AipTSR9	Aiptasia pallida	AIPGENE13448 / KXJ17029.1	TSRx1	1349aa
AipTSR10	Aiptasia pallida	AIPGENE7174 / KXJ23530.1	TSRx1	272aa
AipTSR11	Aiptasia pallida	AIPGENE22538/ AIPGENE22472 / KXJ25202.1	TSRx1	160aa
AipTSR12	Aiptasia pallida	AIPGENE17543 / KXJ27203.1	TSRx1	115aa
AipTSR13	Aiptasia pallida	AIPGENE19619 / KXJ21358.1	TSRx1	94aa
AipTSR14	Aiptasia pallida	AIPGENE9033 / KXJ27830.1	TSRx1	174aa
AipTSR15	Aiptasia pallida	AIPGENE1266 / KXJ28969.1	TSRx1	278aa
AipTSR16	Aiptasia pallida	AIPGENE24366 / KXJ09973.1	TSRx1	394aa
AipTSR17	Aiptasia pallida	AIPGENE16504 / KXJ19322.1	TSRx1	178aa
AipTSR18	Aiptasia pallida	AIPGENE5187 / KXJ23361.1	TSRx2	465aa
AipTSR19	Aiptasia pallida	AIPGENE15077 / KXJ14461.1	TSRx3	268aa
AipTSR20	Aiptasia pallida	AIPGENE17604 / KXJ27233.1	TSRx3	500aa
AipTSR21	Aiptasia pallida	AIPGENE4815 / KXJ14578.1	TSRx4	674aa
AipTSR22	Aiptasia pallida	AIPGENE1176 / KXJ29084.1	TSRx4	1783aa
AipTSR23	Aiptasia pallida	AIPGENE5663 / KXJ12243.1	TSRx5	771aa
AipTSR24	Aiptasia pallida	AIPGENE10970 / KXJ19009.1	TSRx5	500aa
AipTSR22	Aiptasia pallida	AIPGENE5223 / KXJ23379.1	TSRx9	2102aa
A.digTSR1	Acropora digitifera	aug_v2a.01169.t1	TSRx15	1159aa
A.digTSR2	Acropora digitifera	aug_v2a.19596.t1	TSRx7	425aa
A.digTSR3	Acropora digitifera	aug_v2a.05200.t1	TSRx7	494aa
A.digTSR4	Acropora digitifera	aug_v2a.13412.t3	TSRx3	294aa
A.milTSR5	Acropora millepora	c025507	TSRx5	290aa
A.milTSR6	Acropora millepora	c016853	TSRx9	506aa
F.scuTSR1	Fungia scutaria	comp153497	TSRx2	133aa
F.scuTSR2	Fungia scutaria	comp54007	TSRx2	158aa
F.scuTSR3	Fungia scutaria	comp134907	TSRx4	218aa
F.scuTSR4	Fungia scutaria	comp35136	TSRx7	482aa
F.scuTSR5	Fungia scutaria	comp15630	TSRx8	460aa
F.scuTSR6	Fungia scutaria	comp108427	TSRx10	631aa
A.milTSR1	Acropora millepora	c025507	TSRx5	290aa
A.milTSR2	Acropora millepora	c016853	TSRx9	506aa
S.pisTSR1	Stylophora pistillatta	Spis16236	TSRx2	576aa
S.pisTSR2	Stylophora pistillatta	Spis12792	TSRx3	306aa
S.pisTSR3	Stylophora pistillatta	Spis17964	TSRx3	362aa
S.pisTSR4	Stylophora pistillatta	Spis16241	TSRx4	1566aa
S.pisTSR5	Stylophora pistillatta	Spis17966	TSRx4	804aa
S.pisTSR6	Stylophora pistillatta	Spis25860	TSRx4	267aa
S.pisTSR7	Stylophora pistillatta	Spis3194	TSRx5	470aa
S.pisTSR8	Stylophora pistillatta	Spis3252	TSRx5	595aa
S.pisTSR9	Stylophora pistillatta	Spis6482	TSRx5	672aa
S.pisTSR10	Stylophora pistillatta	Spis23313	TSRx5	519aa
S.pisTSR11	Stylophora pistillatta	Spis661	TSRx10	679aa
S.pisTSR12	Stylophora pistillatta	Spis6481	TSRx11	850aa
S.pisTSR13	Stylophora pistillatta	Spis16169	TSRx11	2940aa
S.pisTSR14	Stylophora pistillatta	Spis22531	TSRx18	1090aa

## Sheet: Astacin Metallopeptidases
Sequence	Organism	Original identifier/ Accession Number	Domain structure (Pfam)	Length of protein
N.vecAS1	Nematostella vectensis	232545	Astacin, TSR,	330aa
N.vecAS2	Nematostella vectensis	211915	Astacin, TSR, Lectin C, TSRx2	1498aa
A.eleAS1	Anthopleura elegantissima	comp625	Astacin-TSRx2	257aa
A.eleAS2	Anthopleura elegantissima	comp23921	Astacin-TSRx2-CUBx2-LectinC	1294aa
A.eleAS3	Anthopleura elegantissima	comp27202	Astacin-TSRx15-CUBx2	1649aa
A.eleAS4	Anthopleura elegantissima	comp12431	Astacin-TSRx2-MAM	689aa
A.eleAS5	Anthopleura elegantissima	comp6424	Astacin-TSRx2-MAMx2	769aa
AipAS1	Aiptasia pallida	AIPGENE28534 / KXJ06057.1	Astacin-TSR-MAM-ShKx4	746aa
AipAS2	Aiptasia pallida	AIPGENE2881 / KXJ27875.1	Astacin-TSR-MAM	424aa
AipAS3	Aiptasia pallida	AIPGENE21888 / KXJ14195	Astacin-TSR-TSR-MAM-ShKx3	591aa
AipAS4	Aiptasia pallida	AIPGENE28801 / KXJ16001	Astacin-TSR-MAM-MAM	706aa
AipAS5	Aiptasia pallida	AIPGENE1521 / KXJ21193.1	Astacin-TSR-MAM-WSC	951aa
AipAS6	Aiptasia pallida	AIPGENE4301 / KXJ22024.1	Astacin-TSR	371aa
AipAS7	Aiptasia pallida	AIPGENE7897 / KXJ07880.1	Astacin-TSRx9-LectinC	1207aa
AipAS8	Aiptasia pallida	AIPGENE5059 / KXJ19190.1	Astacin-TSR-TSR-CUB	728aa
AipAS9	Aiptasia pallida	AIPGENE1364 / KXJ29032.1	Astacin-TSR-MAM	640aa
AipAS10	Aiptasia pallida	AIPGENE5053 / KXJ19193.1	Astacin-TSR	598aa
AipAS11	Aiptasia pallida	AIPGENE774	Astacin-TSR-MAM-MAM	746aa
AipAS12	Aiptasia pallida	AIPGENE2086	Astacin-TSR-MAM	566aa
AipAS13	Aiptasia pallida	AIPGENE25980	Astacin-F5_F8_TypeC-TSR-MAMx3	1071aa
AipAS14	Aiptasia pallida	AIPGENE2873	Astacin-TSR-MAM-WSC	679aa
S.pisAS1	Stylophora pistillatta	Spis15483	Astacin-TSR-MAM	568aa
S.pisAS2	Stylophora pistillatta	Spis6194	Astacin-TSRX2	362aa
S.pisAS3	Stylophora pistillatta	Spis6195	Astacin-TSRX2-Astacin	694aa
S.pisAS4	Stylophora pistillatta	Spis4925	Astacin-TSRx2-CUBx2-LectinC	1062aa
S.pisAS5	Stylophora pistillatta	Spis9771	AstacinX2-TSR-MAM	738aa

## Sheet: Trypsin
Sequence	Organism	Original identifier/ Accession Number	Domain structure (Pfam)	Length of protein
A.eleTRYP	Anthopleura elegantissima	comp6788	ShKx2-TSRx4-Trypsin	635aa
AipTRYP1	Aiptasia pallida	AIPGENE1852 / KXJ28164.1	Shk-Shk-TSRx3-Trypsin	603aa
AipTRYP2	Aiptasia pallida	AIPGENE24270 / KXJ22952	LRR_8x2- LRRCT-TSRx5-Sushi-Trypsin	913aa
A.digTRYP	Acropora digitifera	aug_v2a.01708.t1	LLR1-LLR8-TSRx15-Trypsin	1363aa
A.milTRYP1	Acropora millepora	c026763	TSRx3-Sushi-Trypsin	343aa
A.milTRYP2	Acropora millepora	c006359	ShKx2-TSR-ShK-TSRx2-Trypsin	592aa
A.milTRYP3	Acropora millepora	c011355	ShKx2-TSR-ShK-TSR-Trypsin	513aa
F.scuTRYP	Fungia scutaria	comp3626	ShK-TSRx4-Trypsin	562aa
S.pisTRYP1	Stylophora pistillatta	Spis2829	TSR-Trypsin	378aa
S.pisTRYP2	Stylophora pistillatta	Spis2830	Shk-Shk-TSRx3-Trypsin	538aa

## Sheet: VWA
Sequence	Organism	Original identifier/ Accession Number	Domain structure (Pfam)	Length of protein
A.eleVWA1	Anthopleura elegantissima	comp7794	VWAx2-TSR-VWA-TSR-VWA-TSRx4-VWAx3	1774aa
A.eleVWA2	Anthopleura elegantissima	comp40534	TSRx5-VWA	280aa
AipVWA1	Aiptasia pallida	AIPGENE4457 / KXJ23691.1	TSR-VWA	417aa
AipVWA2	Aiptasia pallida	AIPGENE29237 / KXJ25048.1	TSR-TSR-F5_F8_TypeC-VWA	1794aa
AipVWA3	Aiptasia pallida	AIPGENE20111 / KXJ13611.1	TSR-TSR-VWA-F5_F8_TypeC-VWA-CLECT	4415aa
AipVWA4	Aiptasia pallida	AIPGENE29239 / KXJ25066.1	TSP-TSP-F5_F8_TypeCx6-VWA	1511aa
AipVWA5	Aiptasia pallida	AIPGENE12351 / KXJ16857.1	VWA-TSR-VWA-TSRx3-VWA	775aa
AipVWA6	Aiptasia pallida	AIPGENE6809 / KXJ24869.1	VWA-TSR-VWA	554aa
AipVWA7	Aiptasia pallida	AIPGENE14299 / KXJ13689.1	TSR-VWA-VWA	1291aa
AipVWA8	Aiptasia pallida	AIPGENE12357 / KXJ16842.1	VWA-TSR-VWA-TSR-VWA	772aa
A.digVWA1	Acropora digitifera	adi_v1.24510	TSRx4-VWA	427aa
A.digVWA2	Acropora digitifera	adi_v1.20375	TSRx5-VWA	953aa
A.digVWA3	Acropora digitifera	Adi_v1.00391	TSRx5-VWA	1052aa
A.milVWA1	Acropora millepora	c001933	TSRx7-VWAx5	1392aa
A.milVWA2	Acropora millepora	c001272	VWA- TSRx17-VWA	1390aa
A.milVWA3	Acropora millepora	c001380	VWA- TSRx16-VWA	1420aa
A.milVWA4	Acropora millepora	c002257	F5 F8 typeC-TSRx2-VWAx2-F5 F8 typeC	1421aa
F.scuVWA	Fungia scutaria	comp4904	TSRx5-VWAx3-TSR-F5F8TypeC	1315aa
S.pisVWA1	Stylophora pistillatta	Spis17975	TSR-VWAX3	2157aa
S.pisVWA2	Stylophora pistillatta	Spis22146	TSRX2-VWA	466aa
S.pisVWA3	Stylophora pistillatta	Spis13469	TSRX11-VWA	929aa
S.pisVWA4	Stylophora pistillatta	Spis2735	TSRX15-VWA	1101aa
S.pisVWA5	Stylophora pistillatta	Spis14421	TSRX32-VWAX3-Laminin-PA14-GON	4753aa
S.pisVWA6	Stylophora pistillatta	Spis7559	VWA-TSRX3-VWA	597aa
S.pisVWA7	Stylophora pistillatta	Spis7560	VWA TSRX3 VWA TSRX3 VWA	1054aa
S.pisVWA8	Stylophora pistillatta	Spis20570	VWA TSRX11 VWA5	1960aa

## Sheet: Immunoglobulin
Sequence	Organism	Original identifier/ Accession Number	Domain structure (Pfam)	Length of protein
N.vecIG1	Nematostella vectensis	20471	Ig2-TSRX7	422aa
N.vecIG2	Nematostella vectensis	12396	ISET-TSRx3	258aa
A.eleIG	Anthopleura elegantissima	comp146376	Iset-TSRx2	216aa
AipIG1	Aiptasia pallida	AIPGENE16615 / KXJ20285.1	Igx9-TSR-EGFx8	1638aa
AipIG2	Aiptasia pallida	AIPGENE18897 / KXJ09261.1	Collagen-Igx3-TSR	798aa
A.digIG1	Acropora digitifera	adi_v1.11759	TSR-SRCR-Ig_2-Ig_2-SRCR	1186aa
A.digIG2	Acropora digitifera	adi_v1.14581	TSRx3-I set-I set-PLAC	865aa
A.digIG3	Acropora digitifera	adi_v1.07946	TSR-Ig2-I set-Ig2- I set-I set-I set	722aa

## Sheet: TRAP proteins
Sequence	Organism	Original identifier/ Accession Number	Domain structure (Pfam)	Length of protein
P.falTRAP	Plasmodium falciparum	XP_001350088	VWA, TSR	574aa
N.canTRAP	Neospora caninum	AAF01565	VWA, TSRX5	765aa
C.wraTRAP	Cryptosporidium wrairi	AAC48313	TSRX4	660aa
C.parTRAP	Cryptosporidium parvum	XP_628162	TSRX4	687aa
T.gonMNP	Toxoplasma gondii	XP_002367474	VWA, TSRX6	723aa

## Sheet: Symbiodinium all 
Domain structure (Pfam)	Organism	Original identifier/ Accession Number
TSR	Symbiodinium minutum	symb1.aug_v1.005348.t1, symb1.aug_v1.021520.t1, symb1.aug_v1.027162.t1
TSRX2	Symbiodinium minutum	symb1.aug_v1.003962.t1, symb1.aug_v1.003975.t1, symb1.aug_v1.003978.t1, symb1.aug_v1.014388.t1, symb1.aug_v1.014390.t1, symb1.aug_v1.016837.t1, symb1.aug_v1.018264.t1, symb1.aug_v1.019109.t1, symb1.aug_v1.024605.t1, symb1.aug_v1.033361.t1
TSRX3	Symbiodinium minutum	symb1.aug_v1.001669.t1, symb1.aug_v1.022992.t1, symb1.aug_v1.034503.t1, symb1.aug_v1.045455.t1,
TSRX4	Symbiodinium minutum	symb1.aug_v1.003963.t1, symb1.aug_v1.031565.t1, symb1.aug_v1.041011.t1, symb1.aug_v1.046145.t1,
TSRX5	Symbiodinium minutum	symb1.aug_v1.005356.t1, symb1.aug_v1.010301.t1, symb1.aug_v1.010303.t1, symb1.aug_v1.013970.t1, symb1.aug_v1.027027.t1, symb1.aug_v1.044770.t1
TSRX6	Symbiodinium minutum	symb1.aug_v1.027238.t1, symb1.aug_v1.045577.t1
TSRX8	Symbiodinium minutum	symb1.aug_v1.023545.t1, symb1.aug_v1.027239.t1
TSRX9	Symbiodinium minutum	symb1.aug_v1.016836.t1, symb1.aug_v1.022990.t1, symb1.aug_v1.036675.t1
TSRX10	Symbiodinium minutum	symb1.aug_v1.001668.t1
TSRX12	Symbiodinium minutum	symb1.aug_v1.010299.t1
TSRX15	Symbiodinium minutum	symb1.aug_v1.004455.t1, symb1.aug_v1.033360.t1, symb1.aug_v1.039705.t1
TSRX16	Symbiodinium minutum	symb1.aug_v1.043223.t1
TSR	Symbiodinium microadriaticum	Smic37879
TSRX4	Symbiodinium microadriaticum	Smic12618, Smic36680
TSRX5	Symbiodinium microadriaticum	Smic40771
TSRX6	Symbiodinium microadriaticum	Smic37880
TSRX7	Symbiodinium microadriaticum	Smic35858
TSRX9	Symbiodinium microadriaticum	Smic40766
TSRX10	Symbiodinium microadriaticum	Smic35857
TSRX11	Symbiodinium microadriaticum	Smic32370
TSRX12	Symbiodinium microadriaticum	Smic40358
TSRX17	Symbiodinium microadriaticum	Smic28208, Smic1750
TSRX18	Symbiodinium microadriaticum	Smic3496, Smic3496
TSRX19	Symbiodinium microadriaticum	Smic40821
TSRX20	Symbiodinium microadriaticum	Smic33716

## Sheet: Symbiodinium FIG S4
Sequence	Protein type	Organism	Original identifier/ Accession Number	Domain structure (Pfam)	Length of protein
S.minTSR1	TSR only	Symbiodinium minutum	symb1.aug_v1.008489.t1	TSRX5	3248aa
S.minTSR2		Symbiodinium minutum	symb1.aug_v1.031565.t1	TSRX4	626aa
S.minTSR3		Symbiodinium minutum	symb1.aug_v1.039705.t1	TSRX15	1569aa
S.minTSR4		Symbiodinium minutum	symb1.aug_v1.041934.t1	TSR	1035aa
S.micTSR1	TSR only	Symbiodinium microadriaticum	Smic1750	TSRx17	1603aa
S.micTSR2		Symbiodinium microadriaticum	Smic36680	TSRX4	2001aa
S.micTSR3		Symbiodinium microadriaticum	Smic40766	TSRX9	1210aa

[truncated: 1 more sheets: Non cnidarian sequences]
