# Supplementary material for: A diverse host thrombospondin-type-1 repeat protein repertoire promotes symbiont colonization during establishment of cnidarian-dinoflagellate symbiosis
Source: eLife journal article supplement (doi:10.7554/elife.24494), 2017-05-05
Supplement: supp [file elife-24494-supp-v2.zip]

Archive with 16 entries (16 files):
- elife_poa_e24494_Figure_6_Source_Data_File_1.csv
- elife_poa_e24494_Supplementary_File_4.docx
- elife_poa_e24494_Figure_5_Source_Data_File_5.csv
- elife_poa_e24494_Supplementary_File_1.xlsx
- elife_poa_e24494_Figure_5_Source_Data_File_3.csv
- elife_poa_e24494_Figure_3_figure_supplement_1.pdf
- elife_poa_e24494_Figure_4_figure_supplement_2.pdf
- elife_poa_e24494_Supplementary_File_3.docx
- elife_poa_e24494_Supplementary_File_2.docx
- elife_poa_e24494_Figure_5_Source_Data_File_6.csv
- elife_poa_e24494_Figure_5_Source_Data_File_4.csv
- elife_poa_e24494_Figure_2_figure_supplement_1.pdf
- elife_poa_e24494_Figure_4_figure_supplement_1.pdf
- elife_poa_e24494_Source_Code_File_1.html
- elife_poa_e24494_Figure_5_Source_Data_File_2.csv
- elife_poa_e24494_Figure_5_Source_Data_File_1.csv
