# Supplementary figures and images for: A diverse host thrombospondin-type-1 repeat protein repertoire promotes symbiont colonization during establishment of cnidarian-dinoflagellate symbiosis
Source: eLife journal article supplement (doi:10.7554/elife.24494), 2017-05-05

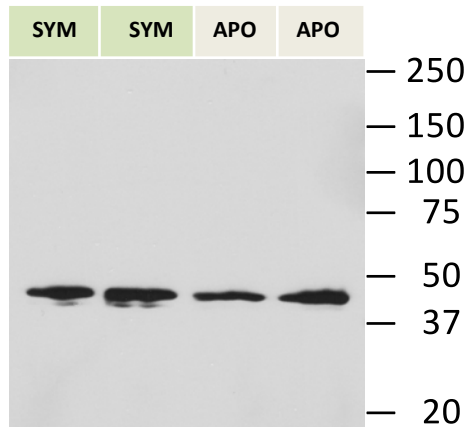

Figure 4 – figure supplement 1. Actin control for immunoblot shown in Figure 4.

Supplement: supp [file elife-24494-supp-v1.zip]
